# Supplementary material
Source: publisher site journal article supplement (http://www.spandidos-publications.com/1153/downloadSupplementary)

Figure S1. Average cell yield of HCA7 cells transfected with BCL-3 or COX-2 siRNA. (A) HCA7 cells were selected for preparation of CM due to high endogenous COX-2/PGE2 levels. Cell yield was not significantly altered by knockdown of BCL-3 or COX-2 over the 72 h period of the experiment. Cell yield is expressed as a percentage of the negative siRNA control cells. Data are presented as the mean of three independent experiments  $\pm$  standard error of the mean. (B) Western blot confirmed knockdown of BCL-3 or COX-2 in HCA7 cells transfected with BCL-3 siRNA or COX-2 siRNA, respectively, prior to harvesting the CM.  $\alpha$ -tubulin was used as the loading control. Results are representative of three independent experiments. BCL-3, B-cell chronic lymphocytic leukaemia 3; COX-2, cyclooxygenase 2; siRNA, small interfering RNA; CM, conditioned medium.

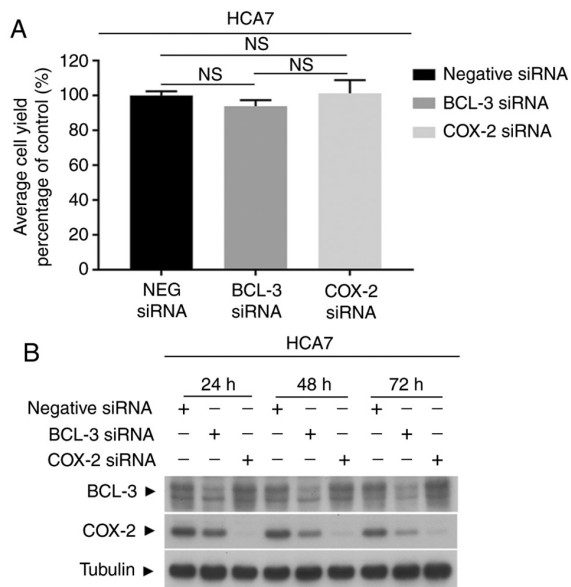

Supplement: Supplementary file 1 [file downloadSupplementary]
